# Supplementary material for: Identification of Epigenetic-Dysregulated lncRNAs Signature in Osteosarcoma by Multi-Omics Data Analysis
Source: PubMed Central journal article supplement (PMC9243510; doi:10.3389/fmed.2022.892593), 2022-06-16

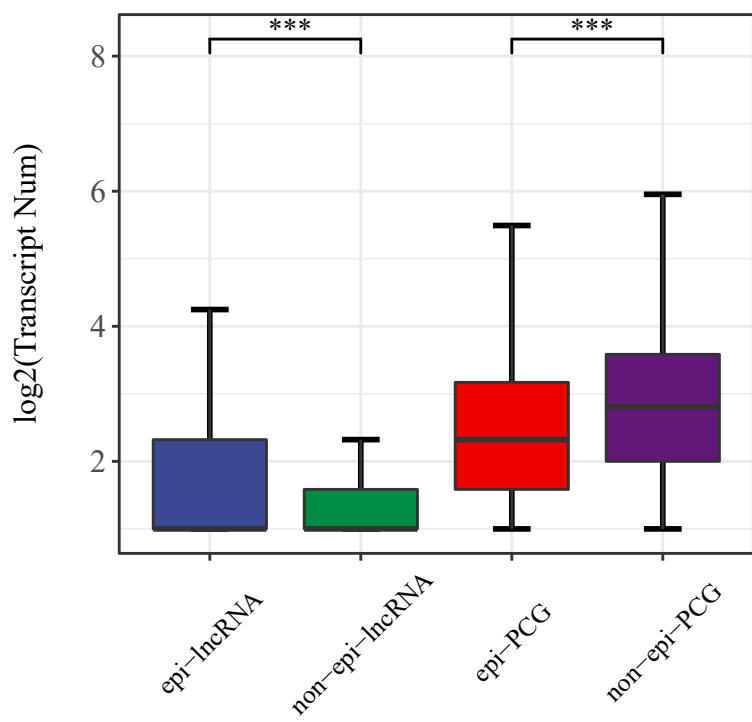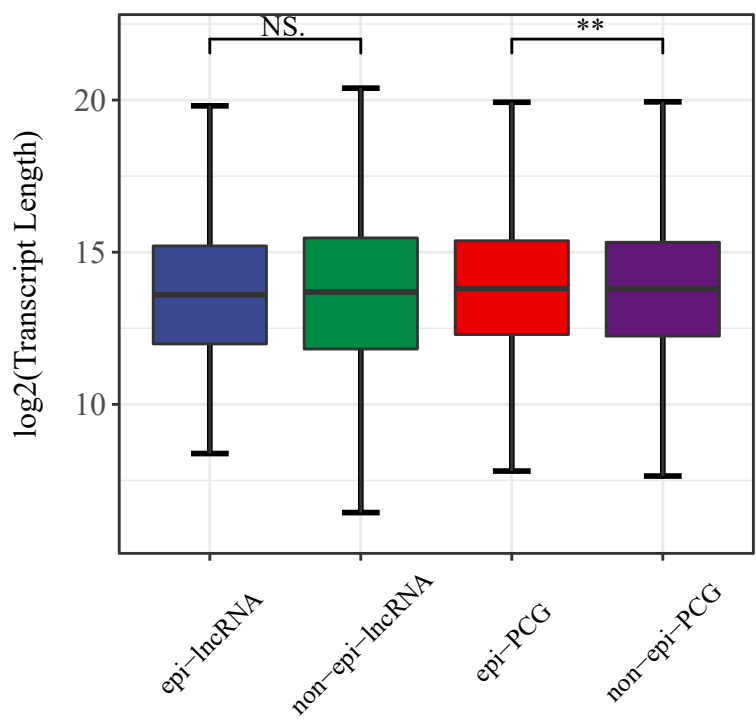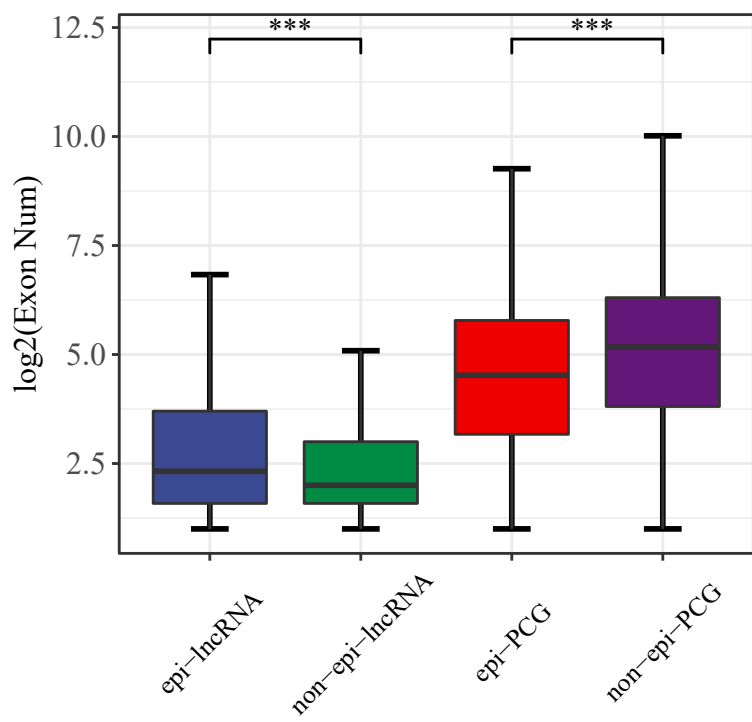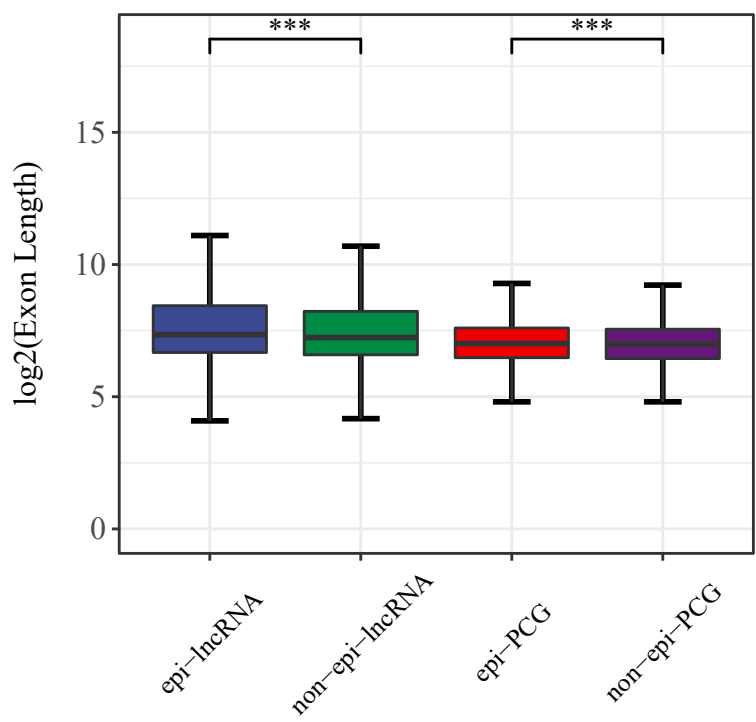

Supplement: Image_1.pdf [file Image_1.pdf]
